# Supplementary material
Source: Springer Nature journal article supplement (https://www.springermedizin.de/resource/supplementary/12885_2014_4965_MOESM4_ESM.pdf/9467872)
Supplement: MOESM4 [file 9467872]

**Table S3. Distribution of concurrent genetic alterations**

| Type of concurrent genetic alterations identified                                    | n | %     |
|--------------------------------------------------------------------------------------|---|-------|
| <i>EGFR</i> mutation + <i>NRAS</i> mutation                                          | 1 | (0.8) |
| <i>EGFR</i> mutation + <i>EGFR</i> copy number gain                                  | 1 | (0.8) |
| <i>EGFR</i> mutation + <i>PIK3CA</i> copy number gain                                | 1 | (0.8) |
| <i>KRAS</i> mutation + <i>PIK3CA</i> mutation                                        | 1 | (0.8) |
| <i>PIK3CA</i> mutation + <i>PIK3CA</i> copy number gain                              | 3 | (2.4) |
| <i>PIK3CA</i> copy number gain + <i>EGFR</i> copy number gain                        | 2 | (1.6) |
| <i>PIK3CA</i> copy number gain + <i>FGFR1</i> copy number gain                       | 2 | (1.6) |
| <i>KRAS</i> mutation + <i>EGFR</i> copy number gain + <i>PIK3CA</i> copy number gain | 1 | (0.8) |
